# Supplementary material for: Turing patterns on polymerized membranes: coarse-grained lattice modelling with an internal degree of freedom for polymer direction
Source: Royal Society of Chemistry journal article supplement (doi:10.1039/d4sm01309c), 2025-01-01
Supplement: d4sm01309c2.pdf [file d4sm01309c2.pdf]

Cite this: DOI: 00.0000/xxxxxxxxxx

## Turing patterns on polymerized membranes: supplementary material (2)

Fumitake Kato,<sup>a</sup> Hiroshi Koibuchi,<sup>a\*</sup> Elie Bretin,<sup>b</sup> Camille Carvalho,<sup>b</sup> Roland Denis,<sup>b</sup> Simon Masnou,<sup>b</sup> Madoka Nakayama,<sup>c</sup> Sohei Tasaki,<sup>d</sup> and Tetsuya Uchimoto<sup>e,f</sup>

Received Date

Accepted Date

DOI: 00.0000/xxxxxxxxxx

In this supplementary material, a detailed exposition of the numerical data on entropy and surface tension is presented. Additionally, the mean value of the coefficient of the Gaussian bond potential is presented.

### 1 Maximum entropy state and related phenomena

The maximum entropy state obtained at  $\lambda = \lambda_c$  is an equilibrium state with the distribution probability  $\exp(-H(\lambda = \lambda_c))$  for any  $R_{xy}$  relatively close to  $R_{xy} = 1$ . It is anticipated that this state will also manifest as an equilibrium state in real membranes. In contrast, a simulated state at  $\lambda \neq \lambda_c$  is not the equilibrium state at  $\lambda = \lambda_c$  because the distribution probability  $\exp(-H(\lambda \neq \lambda_c))$  is different from  $\exp(-H(\lambda = \lambda_c))$ . It can thus be concluded that the simulated state at  $\lambda \neq \lambda_c$  is considered to be a non-equilibrium state in real membranes.

If a membrane for  $R_{xy} = 1$  is immediately stretched to  $R_{xy} = 0.8$ , for instance, then the internal polymer structure will gradually change to the equilibrium structure at  $\lambda = \lambda_c (= 0.6)$ . The relaxation process in the stretched membrane is time-dependent, and therefore, cannot be simulated by the standard MC simulations. Nevertheless, the stretched membrane configuration can be captured within the canonical MC by fixing the initial  $\lambda$  to  $\lambda < 0.6$ .

It is important to note that the ability to describe non-equilibrium states within the canonical modelling framework is a consequence of the incorporation of a novel IDOF, designated as  $\bar{\tau}$ , for the polymer structure. In the extended model, time-dependent phenomena such as relaxation can be described in terms of an equilibrium configuration by controlling  $\bar{\tau}$ . Moreover, the new IDOF enables an accurate representation of energy localisation resulting from the membrane stretching. The energy localisation is linked to time-dependent phenomena in Hamilton's

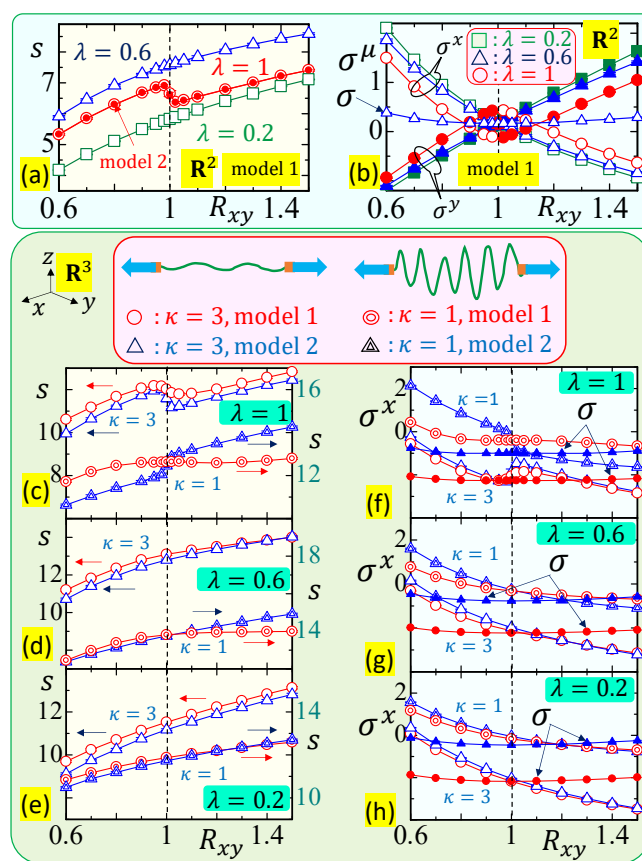

Fig. 1 (a) Entropy  $s (= \delta S / \delta A_p)$  vs.  $R_{xy}$  and (b) surface tension  $\sigma^\mu$ , ( $\mu = x, y$ ) vs.  $R_{xy}$  of model 1 in  $\mathbf{R}^2$  at  $\lambda = 1$  ( $\circ$ ),  $\lambda = 0.6$  ( $\triangle$ ) and  $\lambda = 0.2$  ( $\square$ ). The isotropic  $\sigma$  ( $\triangle$ ) for  $\lambda = 0.6$  is also plotted. The solid symbol ( $\bullet$ ) in (a) represents the results of model 2 at  $\lambda = 1$ . (c)–(h)  $s$  and  $\sigma^x$  of models 1 and 2 in  $\mathbf{R}^3$  for  $\kappa = 1$  and  $\kappa = 3$ . Increasing  $s$ , plotted in (c) represents rubber elasticity. The isotropic  $\sigma$  is also plotted in (f), (g) and (h).

<sup>a</sup> National Institute of Technology (KOSEN), Ibaraki College, Hitachinaka, Japan, E-mail: koi-hiro@sendai-nct.ac.jp

<sup>b</sup> Institut Camille Jordan (ICJ), CNRS, INSA, Université Claude Bernard Lyon 1, Villeurbanne, France, E-mail: masnou@math.univ-lyon1.fr

<sup>c</sup> Tokyo Medical and Dental University, Japan

<sup>d</sup> Department of Mathematics, Hokkaido University, Sapporo, Japan, E-mail: tasaki@math.sci.hokudai.ac.jp

<sup>e</sup> Institute of Fluid Science (IFS), Tohoku University, Sendai, Japan

<sup>f</sup> ELYTMax, CNRS-Université de Lyon-Tohoku University, Sendai, Japan.

particle dynamics, as evidenced in the case that the potential energy is dependent on the space variable. Accordingly, an extended model incorporating a new IDOF is indirectly capable of repre-

sending time-dependent phenomena, which are non-equilibrium configurations in statistical mechanical viewpoint. The source of this intriguing phenomenon can be attributed to the effective and accurate incorporation of external force-induced interaction anisotropy into the intensive components of energies, namely,  $\Gamma_{ij}^{G,b}(\tau)$  and  $D_{ij}^{\mu,\nu}(\tau)$  in Eqs. (5) and (6) in the main text.

Now, we plot  $s$  and the surface tension  $\sigma^\mu$ , ( $\mu = x, y$ ) vs.  $R_{xy}$ , obtained by fixing  $\lambda$  to  $\lambda = 1$ ,  $\lambda = 0.6$  and  $\lambda = 0.2$ , in Figs. 1(a)–(h), where  $\sigma^y$  is plotted only for models in  $\mathbf{R}^2$ . We observe in Fig. 1(a) that  $s$  decrease with decreasing  $R_{xy}$ . This implies that the entropy  $s$  decreases when the surface extends along the  $x$  direction. If we move to the positive direction along the  $R_{xy}$  axis in the region of  $R_{xy} > 1$ , we observe that  $s$  increases. This does not mean the rubber elasticity<sup>1</sup> because the surface is compressed along the  $x$  direction in this case.

As can be seen from Figs. 1(b), it is clear that  $\sigma^x(R_{xy} < 1) > \sigma^x(R_{xy} = 1)$ , which is consistent with the expectation that the surface tension increases with stretching. We find from Fig. 1(b) that  $\sigma^x$  exhibits a gradual increase when  $R_{xy}$  decreases from  $R_{xy} = 1$  for all  $\lambda$ ;  $\lambda = 0.2$  ( $\square$ ),  $\lambda = 0.6$  ( $\triangle$ ) and  $\lambda = 1$  ( $\circ$ ). In the region of  $R_{xy} > 1$ , the surface shape is oblong along the  $y$  direction, where  $\sigma^y$  increases. These responses of  $\sigma^x$  and  $\sigma^y$  to the stretching are physically reasonable.

Results of the models in  $\mathbf{R}^3$  are plotted in Figs. 1(c)–(h), where  $\lambda = 1$ ,  $\lambda = 0.6$  and  $\lambda = 0.2$ . The behaviours of  $s$  and  $\sigma^x$  are nearly analogous to those observed in the models in  $\mathbf{R}^2$ . The entropy is observed to decrease under the stretching.

The isotropic  $\sigma$  ( $\triangle$ ) for  $\lambda = 0.6$  is also plotted in Fig. 1(b). In the case of models in  $\mathbf{R}^2$ ,  $\sigma = 0$  is satisfied when  $(1/N) \sum_{ij} \Gamma_{ij}^G \ell_{ij}^2 \rightarrow 1$  from Eq. (9) in the main text under  $N_{\text{fix}} = 0$ . This condition  $\sigma = 0$  is approximately satisfied when the lattice spacing is given by  $a = 0.525$ , which can be varied depending on the frame area  $A_p$  ( $\propto a^2$ ) in the case of surfaces with a fixed boundary frame. For the models in  $\mathbf{R}^3$ , the condition for  $\sigma = 0$  is given by  $(1/N) \sum_{ij} \Gamma_{ij}^G \ell_{ij}^2 \rightarrow 3/2$  from Eq. (66) in Appendix E of the main text. However, we assume the same value of  $a = 0.525$  in the simulations for the models in  $\mathbf{R}^3$  independent of  $\kappa$ . For this reason,  $\sigma$  as well as  $\sigma^x$  is negative at  $R_{xy} \rightarrow 1$  for  $\kappa = 3$  in contrast to the case of the models in  $\mathbf{R}^2$ . Nevertheless,  $\sigma$  is close to  $\sigma^x$  at  $R_{xy} \rightarrow 1$  as confirmed from Figs. 1(f)–(h).

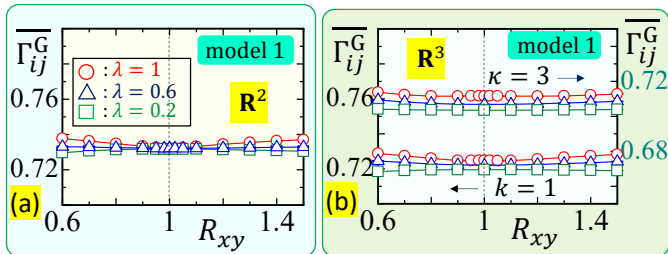

Fig. 2  $\overline{\Gamma_{ij}^G}$  vs.  $R_{xy}$  of model 1 in (a)  $\mathbf{R}^2$  and (b)  $\mathbf{R}^3$  for  $\kappa = 3$  and  $\kappa = 1$ . The parameter  $\lambda$  is fixed to  $\lambda = 1$  ( $\circ$ ),  $\lambda = 0.6$  ( $\triangle$ ) and  $\lambda = 0.2$  ( $\square$ ).

The mean value of  $\overline{\Gamma_{ij}^G} = \frac{1}{N_B} \sum_{ij} \Gamma_{ij}^G$  is plotted in Figs. 2(a),(b) for model 1 in  $\mathbf{R}^2$  and  $\mathbf{R}^3$ , respectively. Three different values of  $\lambda$  are assumed for both cases of  $\mathbf{R}^2$  and  $\mathbf{R}^3$  as in Fig. 1. We find that  $\overline{\Gamma_{ij}^G}$  is almost independent of the lattice deformation by  $R_{xy}$  in

the cases of  $\lambda = 0.6$  ( $\triangle$ ) and  $\lambda = 0.2$  ( $\square$ ). In the case of  $\lambda = 1$  ( $\circ$ ),  $\overline{\Gamma_{ij}^G}$  is slightly influenced by  $R_{xy}$  in the region far from  $R_{xy} = 1$ . It is also noteworthy that the mean values of the coefficients such as  $\Gamma_{ij}^b$  for the models in  $\mathbf{R}^3$  and  $D_{ij}^{\mu,\nu}$  are almost independent of  $R_{xy}$ .

## Acknowledgements

This work is supported in part by Collaborative Research Project J24Ly01 of the Institute of Fluid Science (IFS), Tohoku University. Numerical simulations were performed on the supercomputer system AFI-NITY under the project CLO1JUN24 of the Advanced Fluid Information Research Center, Institute of Fluid Science, Tohoku University.

## Notes and references

- 1 P. J. Flory, *Molecular Theory of Rubber Elasticity*, Polymer Journal, Vol. 17, No. 1, pp 1-12 (1985), <https://www.nature.com/articles/pj19851.pdf>.
